# Supplementary material for: High-performance photocatalysts for overall water splitting: type-II WSi2N4/MoSi2N4 heterostructures
Source: Royal Society of Chemistry journal article supplement (doi:10.1039/d3nj02761a), 2023-01-01
Supplement: d3nj02761a1.pdf [file d3nj02761a1.pdf]

# High-performance photocatalyst for overall water splitting: type-II $\text{WSi}_2\text{N}_4/\text{MoSi}_2\text{N}_4$ heterostructure

*Jiading Bao,<sup>a</sup> Ye Wang,<sup>a</sup> Xiaodong Liu,<sup>a</sup> Rui Zhao,<sup>b\*</sup> Jiabing Yu,<sup>c</sup> Xianping Chen<sup>c</sup>*

<sup>a</sup> Guangxi Key Laboratory of Manufacturing Systems and Advanced Manufacturing Technology, Faculty of Mechanical and Electrical Engineering, Guilin University of Electronic Technology, Guilin, 541004, China.

<sup>b</sup> School of Language and Literature, Guilin University, Guilin, 541006, China.

<sup>c</sup> Key Laboratory of Optoelectronic Technology & Systems, Education Ministry of China, Chongqing University and College of Optoelectronic Engineering, Chongqing University, Chongqing, 400044, China.

**Table S1.** The lattice coefficients ( $\text{\AA}$ ) of single layers within the  $\text{MA}_2\text{Z}_4$  family; the cohesive energy per atom ( $E_{\text{coh}}$ ); Bandgap  $E_{\text{g}}^{\text{PBE}}$  and  $E_{\text{g}}^{\text{HSE}}$  are calculated using PBE and HSE06, respectively.

|                            | Lattice constant<br>( $\text{\AA}$ ) | $E_{\text{coh}}$<br>(eV)/atom | $E_{\text{g}}^{\text{PBE}}$<br>(eV) | $E_{\text{g}}^{\text{HSE}}$<br>(eV) |
|----------------------------|--------------------------------------|-------------------------------|-------------------------------------|-------------------------------------|
| $\text{MoSi}_2\text{P}_4$  | 3.469                                | -6.596                        | 0.685                               | 0.971                               |
| $\text{MoSi}_2\text{As}_4$ | 3.626                                | -5.865                        | 0.594                               | 0.840                               |
| $\text{CrSi}_2\text{N}_4$  | 2.845                                | -8.022                        | 0.495                               | 0.966                               |
| $\text{VSi}_2\text{N}_4$   | 2.875                                | -8.132                        | ---                                 | ---                                 |
| $\text{NbSi}_2\text{N}_4$  | 2.925                                | -8.112                        | ---                                 | ---                                 |
| $\text{TaSi}_2\text{N}_4$  | 2.975                                | -8.542                        | ---                                 | ---                                 |

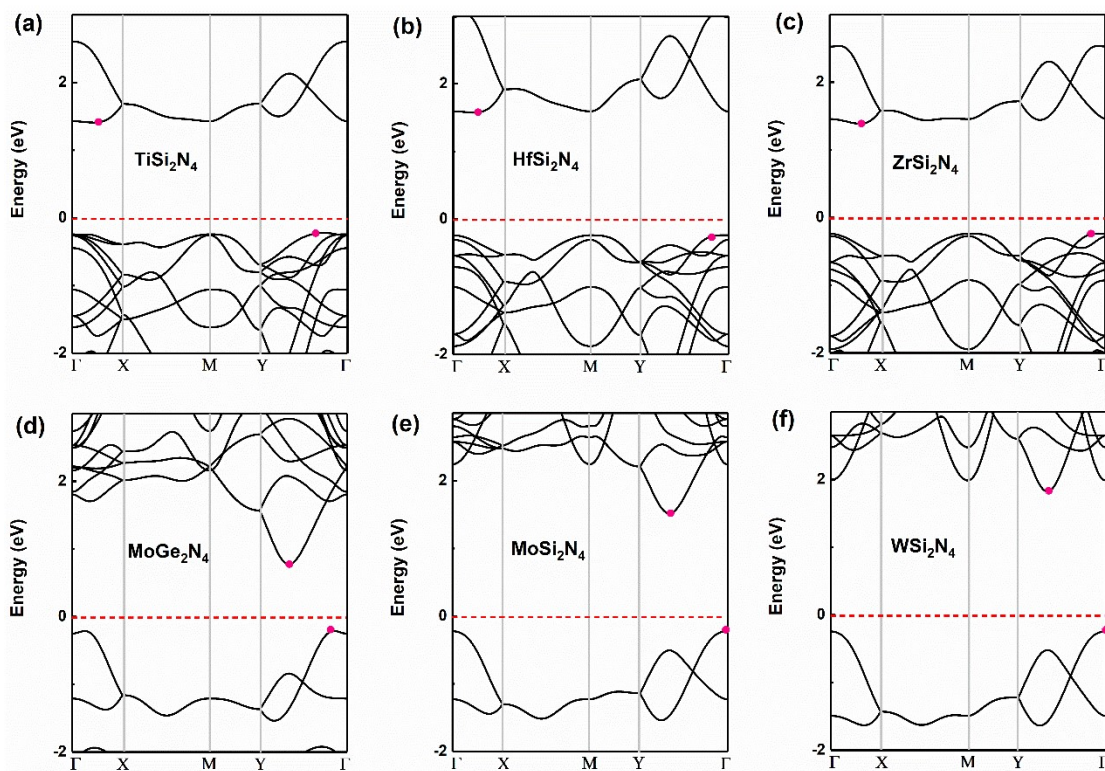

**Fig. S1** Band structures of single-layer MA<sub>2</sub>Z<sub>4</sub> family calculated with the HSE06 method.

The conduction band minimum (CBM) and valence band maximum (VBM) are shown with red solid origin marks. The Fermi-level is at zero energy. All six monolayers are indirect bandgap semiconductors.

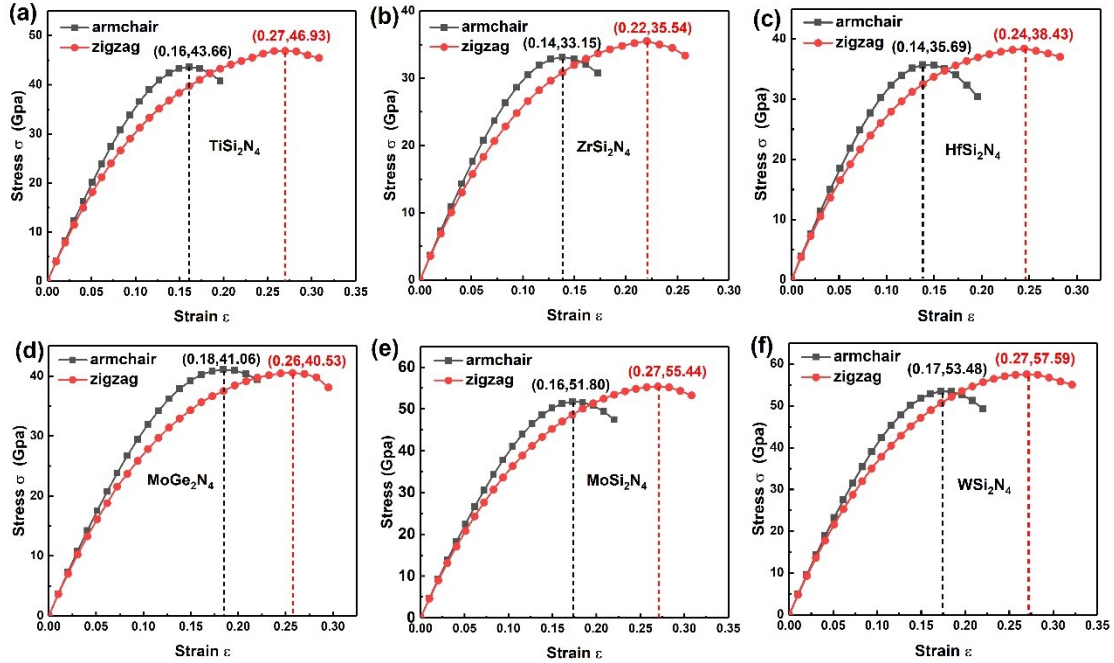

**Fig. S2** Stress-strain curves calculated by DFT of single-layer  $\text{MA}_2\text{N}_4$  family along the zigzag and armchair directions. The red and black curves are along the zigzag and armchair directions, respectively. In the beginning, the trend of the stress-strain curve along both the zigzag and armchair directions shows non-linear increase. In response to increasing strain and the stress intensity reaching the maximum value, there follows a decrease in the stress-strain curve, indicating the broken atomic bond.

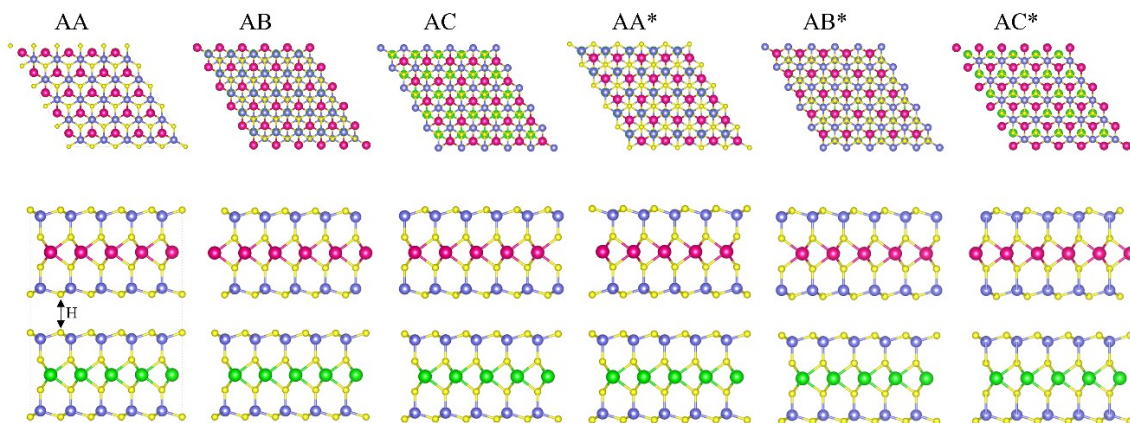

**Fig. S3** The schematic illustration showcases six different stacking configurations of WSi<sub>2</sub>N<sub>4</sub>/MoSi<sub>2</sub>N<sub>4</sub> heterostructures.

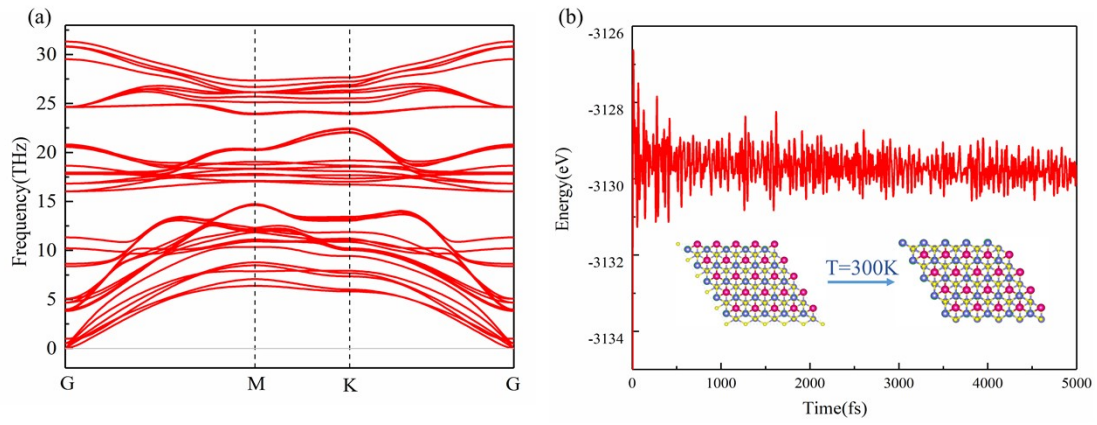

**Fig. S4** (a) Phonon dispersion spectrum of  $\text{WSi}_2\text{N}_4/\text{MoSi}_2\text{N}_4$  heterostructure. (b) AIMD simulations of the  $\text{WSi}_2\text{N}_4/\text{MoSi}_2\text{N}_4$  heterostructure at the temperature of 300 K during 5ps.

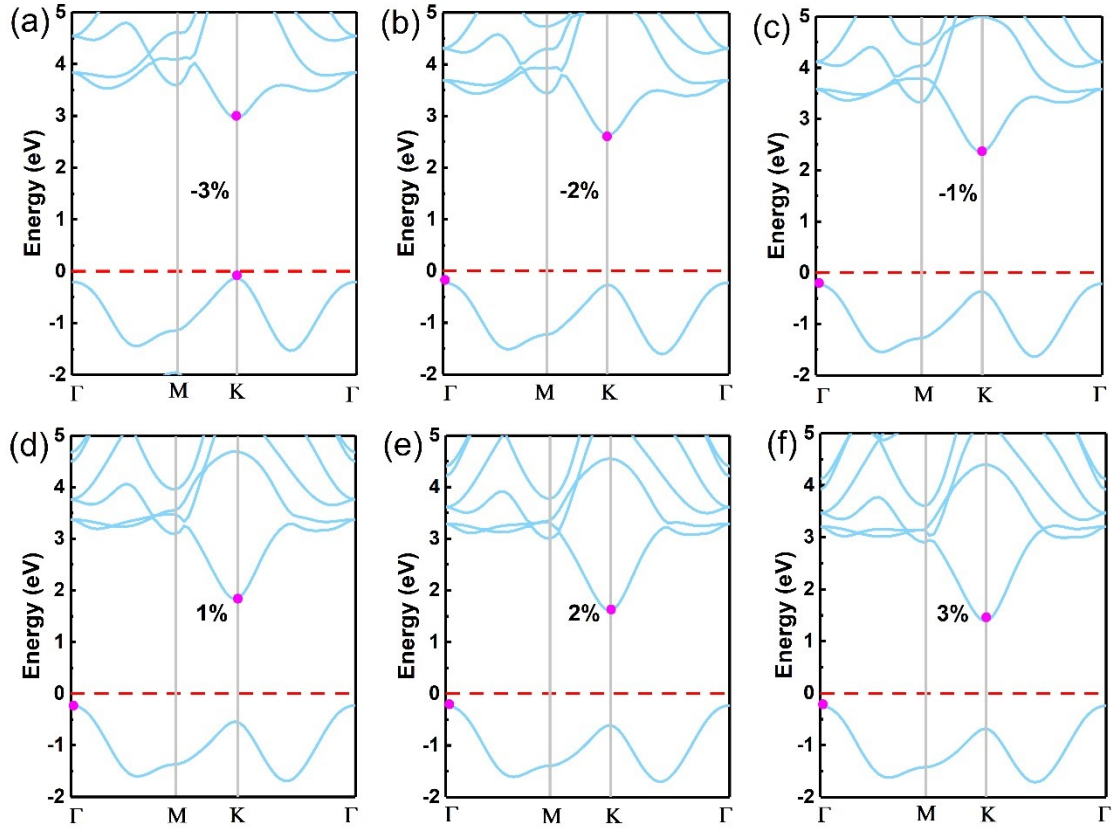

**Fig. S5** Energy band structure of different biaxial strain conditions. The pink dots are the conduction band minimum (CBM) and valence band maximum (VBM), respectively. The  $\text{WSi}_2\text{N}_4/\text{MoSi}_2\text{N}_4$  heterostructure is a direct bandgap semiconductor at -3% biaxial strain. As the strain changes, it transforms into indirect bandgap semiconductor.

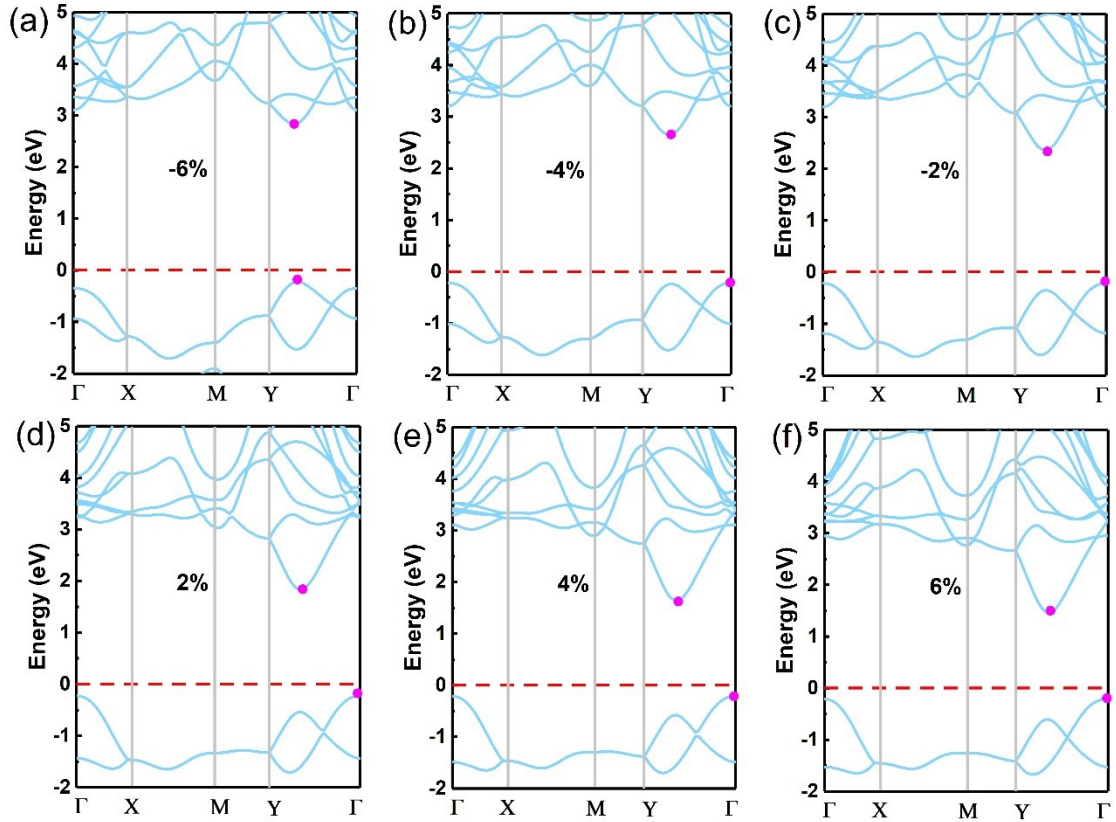

**Fig. S6** Energy band structure of different uniaxial strain conditions in the x-direction.

The pink dots are the conduction band minimum (CBM) and valence band maximum (VBM), respectively. The  $\text{WSi}_2\text{N}_4/\text{MoSi}_2\text{N}_4$  heterostructure is a direct bandgap semiconductor at -6% uniaxial strain. As the strain changes, it transforms into indirect bandgap semiconductor.



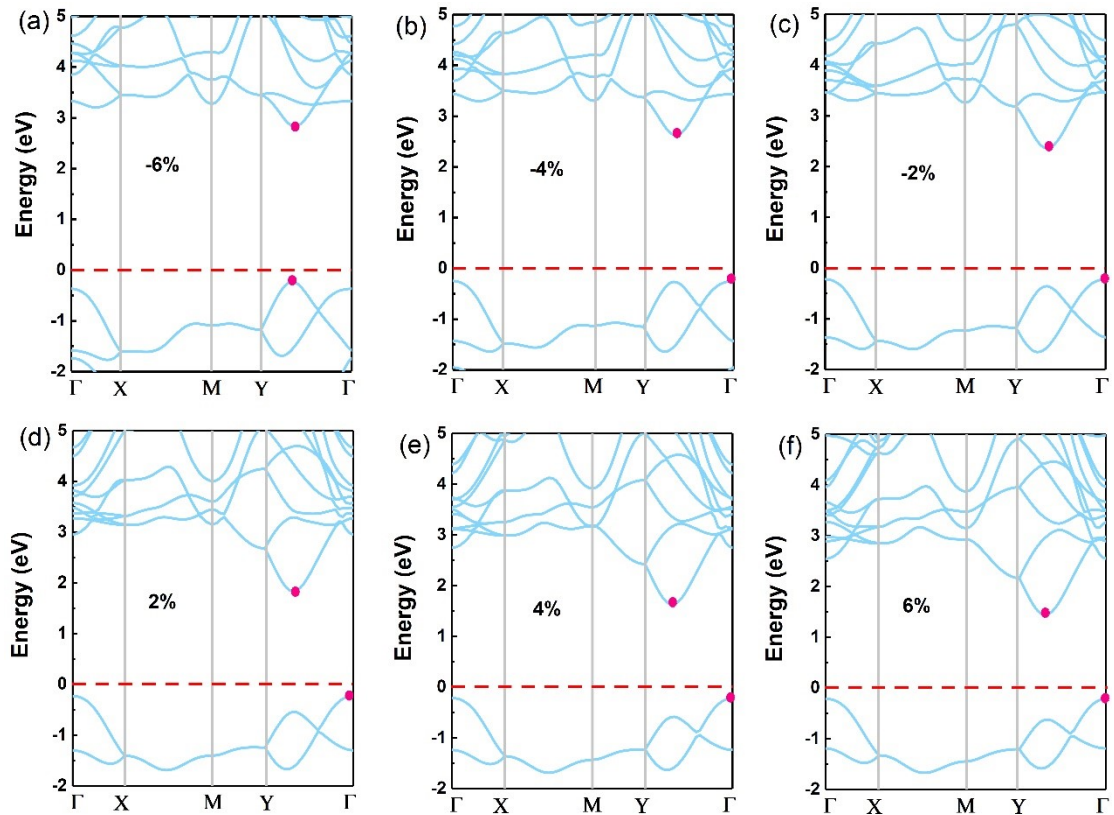

**Fig. S7** Energy band structure of different uniaxial strain conditions in the y-direction.

The pink dots are the conduction band minimum (CBM) and valence band maximum (VBM), respectively. The  $\text{WSi}_2\text{N}_4/\text{MoSi}_2\text{N}_4$  heterostructure is a direct bandgap semiconductor at -6% uniaxial strain. As the strain changes, it transforms into indirect bandgap semiconductor.
